# Supplementary material
Source: PubMed Central journal article supplement (PMC8753535)
Supplement: sj-pdf-2-hss-10.1177_15563316211008137.pdf [file sj-pdf-2-hss-10.1177_15563316211008137.pdf]

## **Appendix:**

### **PubMed**

"Rotator Cuff Injuries"[Mesh] OR "Rotator Cuff/surgery"[Mesh] OR "Rotator Cuff Tear Arthropathy"[Mesh] OR "Rotator Cuff Tear Arthropathy/surgery"[Mesh] OR massive cuff tear arthropathy[tiab] OR massive rotator cuff tear injuries[tiab] OR massive rotator cuff tear\*[tiab] OR massive cuff tear\*[tiab]

### **AND**

"Arthroscopy"[Mesh] OR "Hemiarthroplasty"[Mesh] OR "Arthroplasty, Replacement, Shoulder"[Mesh] OR "Transplants"[Mesh] OR "Autografts"[Mesh] OR "Bone-Patellar Tendon-Bone Grafts"[Mesh] OR "Composite Tissue Allografts"[Mesh] OR "Exercise Therapy"[Mesh] OR "Endurance Training"[Mesh] OR "Motion Therapy, Continuous Passive"[Mesh] OR "Muscle Stretching Exercises"[Mesh] OR "Resistance Training"[Mesh] OR Arthroscopic rotator cuff repair[tiab] OR Rotator cuff repair[tiab] OR Arthroscopic Surgery[tiab] OR Arthroscopi\*[tiab] OR Arthroscopic Surgical Procedure\*[tiab] OR Hemiarthroplasties[tiab] OR Hemi-Arthroplasty[tiab] OR Hemi Arthroplasty[tiab] OR Hemi-Arthroplasties[tiab] OR reverse shoulder replacement[tiab] OR shoulder hemiarthroplasty[tiab] OR reverse total shoulder arthroplasty[tiab] OR RTSA[tiab] OR cuff tear arthropathy[tiab] OR augmented repair[tiab] OR Rotator cuff augmentation[tiab] OR Rotator cuff interposition[tiab] OR Physical therapy[tiab] OR Strength Training[tiab] OR endurance training[tiab] OR Resistance Training[tiab] OR Weight-Lifting Strengthening Program\*[tiab] OR Weight Lifting Strengthening Program\*[tiab] OR Weight-Lifting Exercise Program\*[tiab] OR Weight Lifting Exercise Program\*[tiab] OR Weight-Bearing Strengthening Program\*[tiab] OR Weight Bearing Strengthening Program\*[tiab] OR Weight-Bearing Exercise Program\*[tiab] OR Weight Bearing Exercise Program\*[tiab] OR Muscle Stretching Exercise\*[tiab] OR Static Stretching[tiab] OR Passive Stretching[tiab] OR Static-Passive Stretching[tiab] OR Static Passive Stretching[tiab] OR Isometric Stretching[tiab] OR Active Stretching[tiab] OR Static-Active Stretching[tiab] OR Static Active Stretching[tiab] OR Ballistic Stretching[tiab] OR Dynamic Stretching[tiab] OR Continuous Passive Motion Therapy[tiab] OR CPM Therapy[tiab] OR Remedial Exercise\*[tiab] OR Exercise Therap\*[tiab] OR Rehabilitation Exercise\*[tiab]

### **AND**

"Retrospective Studies"[Mesh] OR "Follow-Up Studies"[Mesh] OR "Recovery of Function"[Mesh] OR "Range of Motion, Articular"[Mesh] OR "Treatment Outcome"[Mesh] OR "Quality of Life"[Mesh] OR "Treatment Failure"[Mesh] OR "Reoperation"[Mesh] OR "Postoperative Complications"[Mesh] OR "Pain Measurement"[Mesh] OR "Patient Reported Outcome Measures"[Mesh] OR retrospective studies[tiab] OR Long-term outcome studies[tiab] OR long-term outcome study[tiab] OR Long term outcome studies[tiab] OR long term outcome study[tiab] OR implant survivorship[tiab] OR metal survivorship[tiab] OR long-term functional outcome[tiab] OR long term functional outcome[tiab] OR long-term follow-up[tiab] OR long term follow-up[tiab] OR long term follow up studies[tiab] OR long-term follow-up studies[tiab] OR follow up study[tiab] OR follow-up study[tiab] OR followup studies[tiab] OR followup

study[tiab] OR quality of life[tiab] OR life quality[tiab] OR long-term treatment outcome\*[tiab] OR long term treatment outcome\*[tiab] OR treatment outcome\*[tiab] OR recovery of function[tiab] OR function recovery[tiab] OR postoperative complication\*[tiab] OR pain measurement\*[tiab] OR treatment failure\*[tiab] OR therapy failure\*[tiab] OR revision\*[tiab] OR conversion\*[tiab] OR functional score\*[tiab] OR PROMS[tiab] OR subjective outcome\*[tiab] OR patient reported outcome score\*[tiab] OR Patient Reported Outcome\*[tiab] OR Patient-Reported Outcome\*[tiab] OR long-term clinical outcome\*[tiab] OR long term clinical outcome\*[tiab] OR clinical outcome\*[tiab] OR patient outcome[tiab] OR therapeutic outcome[tiab] OR therapy outcome[tiab] OR clinical patient outcome[tiab] OR clinical therapeutic outcome[tiab] OR clinical therapy outcome[tiab] OR clinical treatment outcome[tiab] OR long-term patient outcome[tiab] OR long-term therapeutic outcome[tiab] OR long-term therapy outcome[tiab] OR long-term clinical patient outcome[tiab] OR long-term clinical therapeutic outcome[tiab] OR long-term clinical therapy outcome[tiab] OR long-term clinical treatment outcome[tiab] OR long term patient outcome[tiab] OR long term therapeutic outcome[tiab] OR long term therapy outcome[tiab] OR long term clinical patient outcome[tiab] OR long term clinical therapeutic outcome[tiab] OR long term clinical therapy outcome[tiab] OR long term clinical treatment outcome[tiab]

## **Embase**

'rotator cuff injury'/de OR 'rotator cuff injury'/dm\_su OR 'rotator cuff tear arthropathy'/de OR 'rotator cuff tear arthropathy'/de/dm\_su OR 'massive cuff tear arthropathy':ab,ti OR 'massive rotator cuff tear injuries':ab,ti OR 'massive rotator cuff tear\*':ab,ti OR 'massive cuff tear\*':ab,ti OR 'massive rotator cuff rupture\*':ab,ti OR 'massive rotatory cuff rupture\*':ab,ti OR 'massive shoulder rotator cuff rupture\*':ab,ti OR 'massive shoulder rotator cuff tear\*':ab,ti

## **AND**

'arthroscopy'/de OR 'hemiarthroplasty'/de OR 'shoulder replacement'/de OR 'shoulder hemiarthroplasty'/de OR 'reverse shoulder arthroplasty'/de OR 'total shoulder arthroplasty'/de OR 'transplantation'/exp OR 'autograft'/de OR 'allograft'/de OR 'bone allograft'/de OR 'composite graft'/de OR 'bone patellar tendon bone graft'/de OR 'physiotherapy'/de OR 'kinesiotherapy'/de OR 'movement therapy'/de OR 'muscle training'/de OR 'resistance training'/de OR 'endurance training'/de OR 'Arthroscopic rotator cuff repair':ab,ti OR 'Rotator cuff repair':ab,ti OR 'Arthroscopic Surgery':ab,ti OR 'Arthroscopi\*':ab,ti OR 'Arthroscopic Surgical Procedure\*':ab,ti OR 'Hemiarthroplasties':ab,ti OR 'Hemi-Arthroplasty':ab,ti OR 'Hemi Arthroplasty':ab,ti OR 'Hemi-Arthroplasties':ab,ti OR 'reverse shoulder replacement\*':ab,ti OR 'shoulder hemiarthroplast\*':ab,ti OR 'shoulder hemi-arthroplast\*':ab,ti OR 'reverse shoulder arthroplast\*':ab,ti OR 'reverse total shoulder arthroplast\*':ab,ti OR 'RTSA':ab,ti OR 'cuff tear arthropathy\*':ab,ti OR 'augmented repair\*':ab,ti OR 'Rotator cuff augmentation':ab,ti OR 'Rotator cuff interposition':ab,ti OR 'composite allograft\*':ab,ti OR 'composite tissue allograft\*':ab,ti OR 'composite tissue graft\*':ab,ti OR 'composite tissue transplant\*':ab,ti OR 'bone patellar tendon bone graft\*':ab,ti OR 'bone-patellar tendon-bone graft\*':ab,ti OR 'Physical therapy':ab,ti OR 'Strength Training':ab,ti OR 'endurance training':ab,ti OR 'Resistance Training':ab,ti OR 'Weight-Lifting Strengthening Program\*':ab,ti OR 'Weight

Lifting Strengthening Program\*':ab,ti OR 'Weight-Lifting Exercise Program\*':ab,ti OR 'Weight Lifting Exercise Program\*':ab,ti OR 'Weight-Bearing Strengthening Program\*':ab,ti OR 'Weight Bearing Strengthening Program\*':ab,ti OR 'Weight-Bearing Exercise Program\*':ab,ti OR 'Weight Bearing Exercise Program\*':ab,ti OR 'Muscle Stretching Exercise\*':ab,ti OR 'Static Stretching':ab,ti OR 'Passive Stretching':ab,ti OR 'Static-Passive Stretching':ab,ti OR 'Static Passive Stretching':ab,ti OR 'Isometric Stretching':ab,ti OR 'Active Stretching':ab,ti OR 'Static-Active Stretching':ab,ti OR 'Static Active Stretching':ab,ti OR 'Ballistic Stretching':ab,ti OR 'Dynamic Stretching':ab,ti OR 'Continuous Passive Motion Therapy':ab,ti OR 'CPM Therapy':ab,ti OR 'Remedial Exercise\*':ab,ti OR 'Exercise Therap\*':ab,ti OR 'Rehabilitation Exercise\*':ab,ti

## **AND**

'retrospective study'/de OR 'follow up'/de OR 'convalescence'/de OR 'range of motion'/de OR 'treatment outcome'/de OR 'clinical outcome'/de OR 'patient-reported outcome'/de OR 'treatment failure'/de OR 'quality of life'/de OR 'reoperation'/de OR 'postoperative complication'/de OR 'pain measurement'/de OR 'retrospective studies':ab,ti OR 'Long-term outcome studies':ab,ti OR 'long-term outcome study':ab,ti OR 'Long term outcome studies':ab,ti OR 'long term outcome study':ab,ti OR 'implant survivorship':ab,ti OR 'metal survivorship':ab,ti OR 'long-term functional outcome':ab,ti OR 'long term functional outcome':ab,ti OR 'long-term follow-up':ab,ti OR 'long term follow-up':ab,ti OR 'long term follow up studies':ab,ti OR 'long-term follow-up studies':ab,ti OR 'follow up study':ab,ti OR 'follow-up study':ab,ti OR 'followup studies':ab,ti OR 'followup study':ab,ti OR 'quality of life':ab,ti OR 'life quality':ab,ti OR 'long-term treatment outcome\*':ab,ti OR 'long term treatment outcome\*':ab,ti OR 'treatment outcome\*':ab,ti OR 'recovery of function':ab,ti OR 'function recovery':ab,ti OR 'postoperative complication\*':ab,ti OR 'pain measurement\*':ab,ti OR 'treatment failure\*':ab,ti OR 'therapy failure\*':ab,ti OR 'revision\*':ab,ti OR 'conversion\*':ab,ti OR 'functional score\*':ab,ti OR 'PROMS':ab,ti OR 'subjective outcome\*':ab,ti OR 'patient reported outcome score\*':ab,ti OR 'Patient Reported Outcome\*':ab,ti OR 'Patient-Reported Outcome\*':ab,ti OR 'long-term clinical outcome\*':ab,ti OR 'long term clinical outcome\*':ab,ti OR 'clinical outcome\*':ab,ti OR 'patient outcome':ab,ti OR 'therapeutic outcome':ab,ti OR 'therapy outcome':ab,ti OR 'clinical patient outcome':ab,ti OR 'clinical therapeutic outcome':ab,ti OR 'clinical therapy outcome':ab,ti OR 'clinical treatment outcome':ab,ti OR 'long-term patient outcome':ab,ti OR 'long-term therapeutic outcome':ab,ti OR 'long-term therapy outcome':ab,ti OR 'long-term clinical patient outcome':ab,ti OR 'long-term clinical therapeutic outcome':ab,ti OR 'long-term clinical therapy outcome':ab,ti OR 'long-term clinical treatment outcome':ab,ti OR 'long term patient outcome':ab,ti OR 'long term therapeutic outcome':ab,ti OR 'long term therapy outcome':ab,ti OR 'long term clinical patient outcome':ab,ti OR 'long term clinical therapeutic outcome':ab,ti OR 'long term clinical therapy outcome':ab,ti OR 'long term clinical treatment outcome':ab,ti

## **Cochrane Library**

"Rotator Cuff Injuries" OR "Rotator Cuff surgery" OR "Rotator Cuff Tear Arthropathy" OR "Rotator Cuff Tear Arthropathy surgery" OR "massive cuff tear arthropathy" OR "massive rotator cuff tear injuries" OR "massive rotator cuff tear" OR "massive cuff tear"

**AND**

Arthroscopy OR Hemiarthroplasty OR "Arthroplasty, Replacement, Shoulder" OR Transplants OR "Autografts" OR "Bone-Patellar Tendon-Bone Grafts" OR "Composite Tissue Allografts" OR "Exercise Therapy" OR "Endurance Training" OR "Motion Therapy, Continuous Passive" OR "Muscle Stretching Exercises" OR "Resistance Training" OR "reverse shoulder replacement" OR "reverse total shoulder arthroplasty" OR "cuff tear arthropathy" OR "augmented repair" OR "Rotator cuff augmentation" OR "Rotator cuff interposition" OR "Arthroscopic rotator cuff repair" OR "Rotator cuff repair" OR "Physical therapy" OR "Strength Training" OR "endurance training" OR "Weight Lifting Strengthening Program" OR "Weight Lifting Exercise Program" OR "Weight Bearing Strengthening Program" OR "Weight Bearing Exercise Program" OR "Static Stretching" OR "Passive Stretching" "Static Passive Stretching" OR "Isometric Stretching" OR "Active Stretching" OR "Static Active Stretching" OR "Ballistic Stretching" OR "Dynamic Stretching" OR "Continuous Passive Motion Therapy" OR "Remedial Exercise\*" OR "Rehabilitation Exercise"

**AND**

"Retrospective Studies" OR "Follow-Up Studies" OR "Recovery of Function" OR "Range of Motion, Articular" OR "Treatment Outcome" OR "Quality of Life" OR "Treatment Failure" OR "Reoperation" OR "Postoperative Complications" OR "Pain Measurement" OR "Patient Reported Outcome Measures" OR "retrospective studies" OR "Long term outcome studies" OR "long term outcome study" OR "implant survivorship" OR "metal survivorship" OR "long term functional outcome" OR "long term follow up" OR "follow up study" OR "quality of life" OR "life quality" OR "long term treatment outcome" OR "treatment outcome" OR "recovery of function" OR "function recovery" OR "postoperative complication" OR "pain measurement" OR "treatment failure" OR "therapy failure" OR revision OR conversion OR "functional score" OR "subjective outcome" OR "patient reported outcome score" OR "Patient Reported Outcome" OR "long term clinical outcome" OR "clinical outcome" OR "patient outcome" OR "therapeutic outcome" OR "therapy outcome" OR "clinical patient outcome" OR "clinical therapeutic outcome" OR "clinical therapy outcome" OR "clinical treatment outcome" OR "long term patient outcome" OR "long term therapeutic outcome" OR "long term therapy outcome" OR "long term clinical patient outcome" OR "long term clinical therapeutic outcome" OR "long term clinical therapy outcome" OR "long term clinical treatment outcome" OR "long term patient outcome" OR "long term therapeutic outcome" OR "long term therapy outcome" OR "long term clinical patient outcome" OR "long term clinical therapeutic outcome" OR "long term clinical therapy outcome" OR "long term clinical treatment outcome"
